# Supplementary material for: Influence of HF2− geometry on magnetic interactions elucidated from polymorphs of the metal–organic framework [Ni(HF2)(pyz)2]PF6 (pyz = pyrazine)
Source: Royal Society of Chemistry journal article supplement (doi:10.1039/c2dt30113j), 2012-01-01
Supplement: c2dt30113j.pdf [file c2dt30113j.pdf]

Electronic supplementary information:

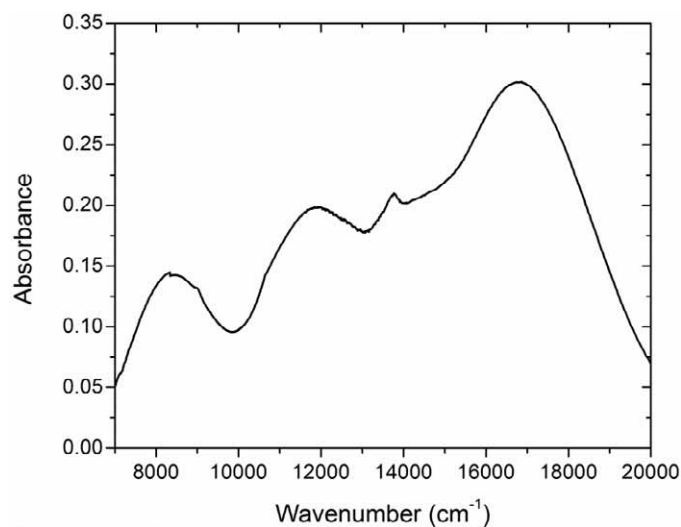

**Figure S1.** Solid state UV-Vis spectrum of  $\beta$ -[Ni(HF<sub>2</sub>)(pyz)<sub>2</sub>]PF<sub>6</sub> obtained at 295 K.

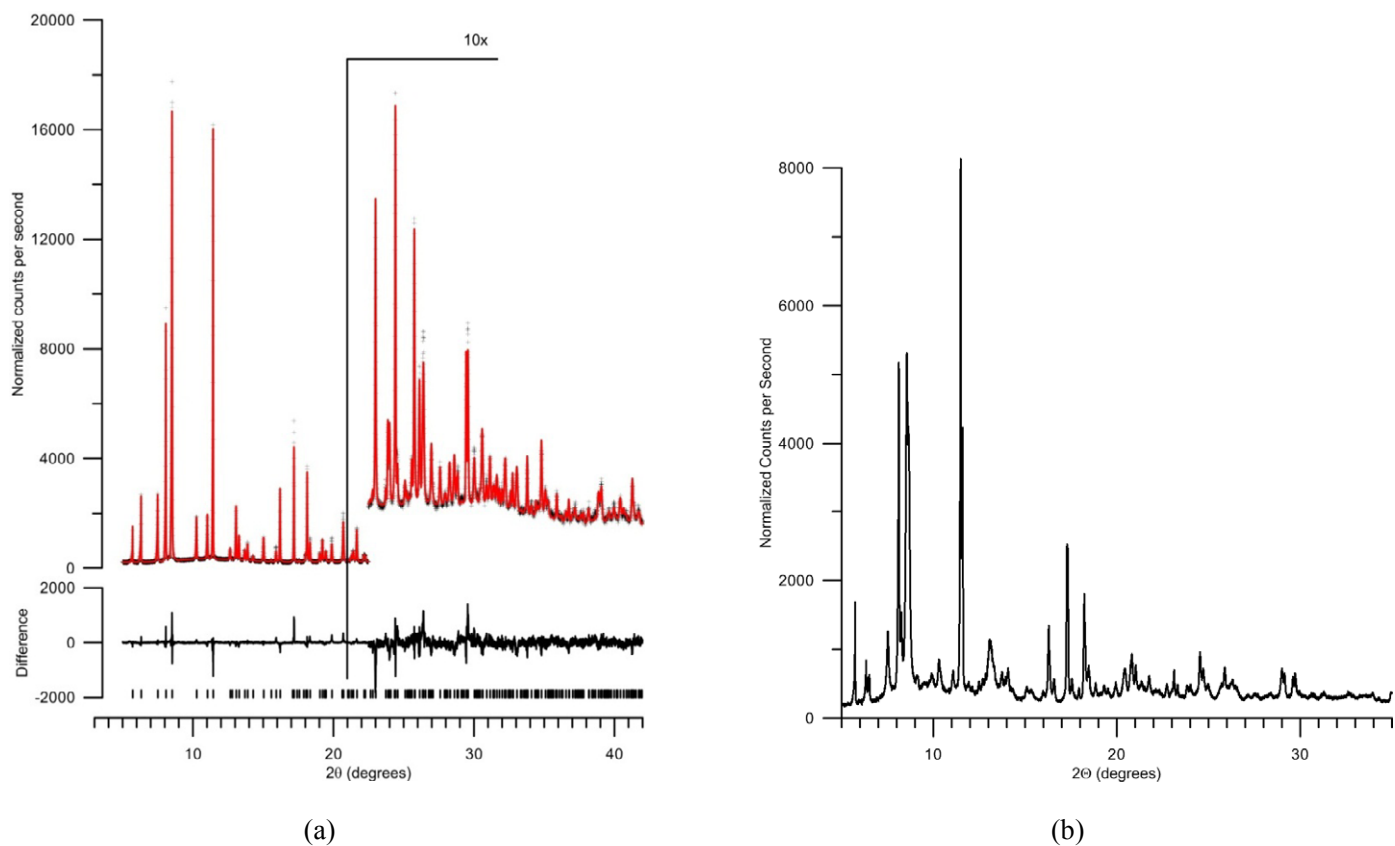

**Figure S2.** (a) Room temperature synchrotron X-ray powder diffraction data (+), Rietveld refinement (red) and difference curve (bottom) for  $\beta$ -[Ni(HF<sub>2</sub>)(pyz)<sub>2</sub>]PF<sub>6</sub>. (b) For comparison, the powder pattern of the same material at 80 K.

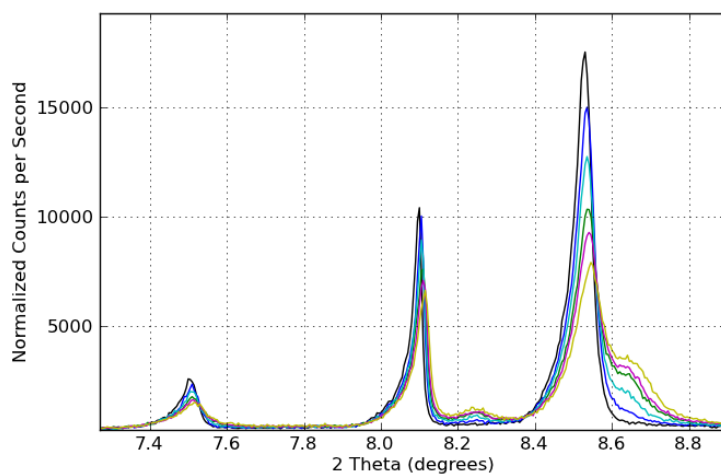

**Figure S3.** X-ray powder diffraction patterns obtained at different temperatures: 295K (Black), 245 K (Blue), 215K (Green), 180K (Cyan), 140K (Magenta), 90K (Yellow). The sample reverted back to the 295K pattern upon warming.

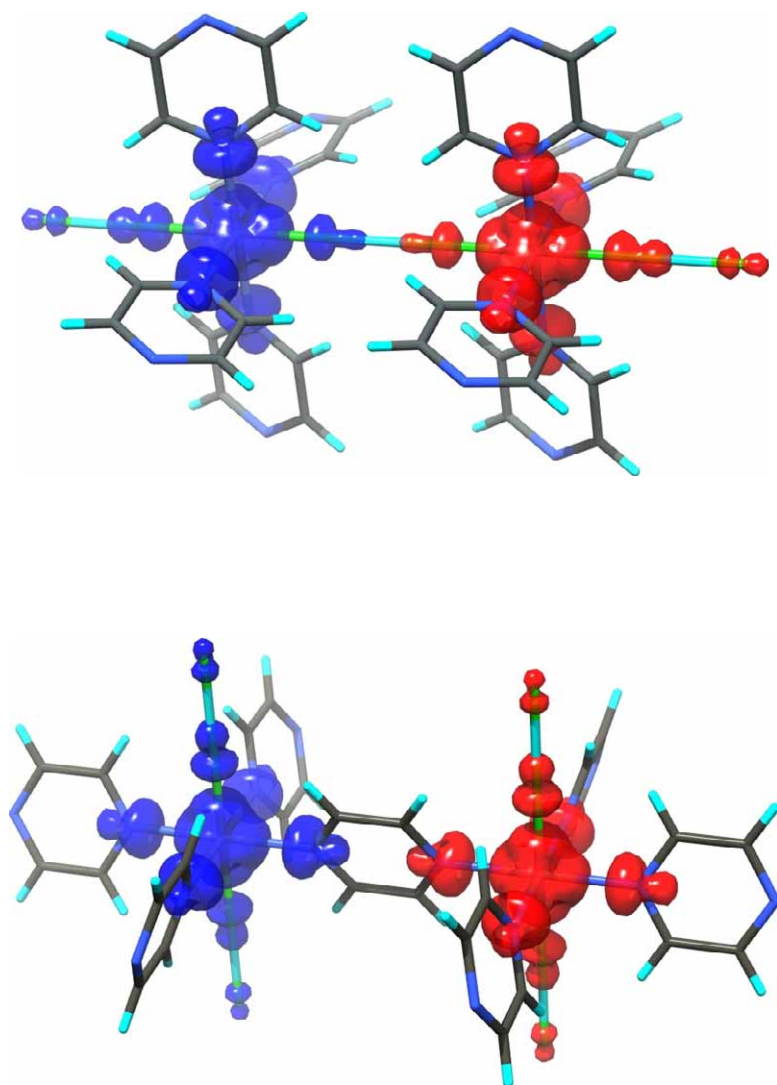

**Figure S4.** Spin densities for the broken-symmetry (BS) states of {Ni-FHF-Ni} (top) and {Ni-pyz-Ni} (bottom) fragments. The isosurface value is  $\pm 0.002$  for both plots. The two-fold symmetry of the former fragment prevents any spin density on the central hydrogen of the bifluoride bridge in the BS-state.
